# Supplementary material
Source: Springer Nature journal article supplement (https://www.springermedizin.de/resource/supplementary/12960_2011_301_MOESM2_ESM.pdf/9569804)
Supplement: MOESM2 [file 9569804]

■ **Vision: Articulation of an aspirational, value-based vision for improving the future health of the country**

- Strong sense of nationalism, country ownership and confidence
- Guided by moral principles coupled with commitment to action
- Aim to develop the next generation of leaders

■ **Complementarity: Self awareness, identification and use complimentary skills in others**

- Understanding of own strengths and limitation
- Assembly and management diverse teams
- Investment in human resources where needed

■ **Relationships: Development and sustenance of relationships to leverage human resources**

- Open and continuous communication
- Engagement with multiple partners across and up/down the hierarchy
- Recognition of value in others' contributions
- Listening

■ **Data: Strategic use of data to ground leadership efforts**

- Advocacy for and investment in strong data infrastructure
- Use of data to inform policy, conduct advocacy, gain funding and set priorities

■ **Learning: Professional identity shaped around a commitment to learning**

- Openness to learning from your own mistakes
- Respect for a broad range of vantage points
- Collective problem solving approach to find organizational solutions
